# Supplementary material for: A label-free ratiometric fluorescence strategy for 3′–5′ exonuclease detection
Source: Royal Society of Chemistry journal article supplement (doi:10.1039/c8nj03242d), 2018-01-01
Supplement: c8nj03242d1.pdf [file c8nj03242d1.pdf]

## A label-free ratiometric fluorescent strategy for 3'-5' exonuclease detection

Wei Hu, Heng-Zhi Zhao, Jing Jing\* and Xiao-Ling Zhang\*

Key Laboratory of Cluster Science of Ministry of Education, Beijing Key Laboratory of Photo-electronic/Electro- photonic Conversion Materials, School of Chemistry and Chemical Engineering, Beijing Institute of Technology, Beijing 100081, P. R. China.

E-mail: [zhangxl@bit.edu.cn](mailto:zhangxl@bit.edu.cn), [hellojane@bit.edu.cn](mailto:hellojane@bit.edu.cn)

### Optimization of experimental conditions

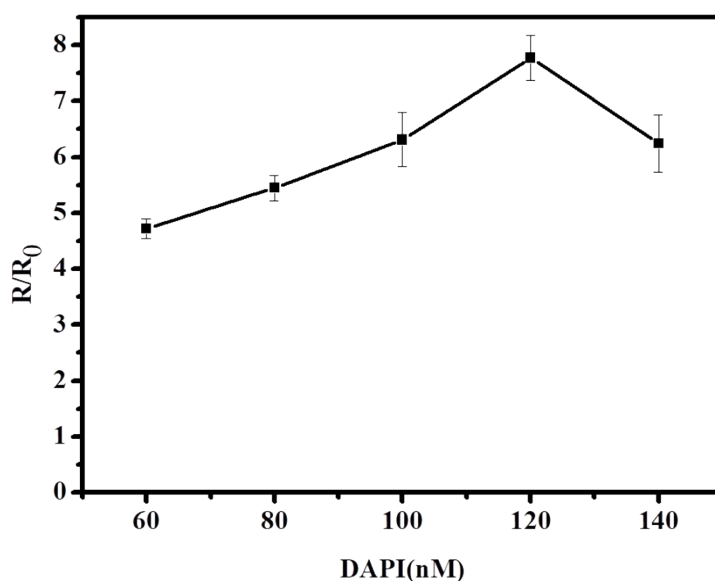

**Fig. S1.** Effect of DAPI concentration on the signal-to-background ratio ( $R/R_0$ ). Error bars were estimated from three replicate measurements.

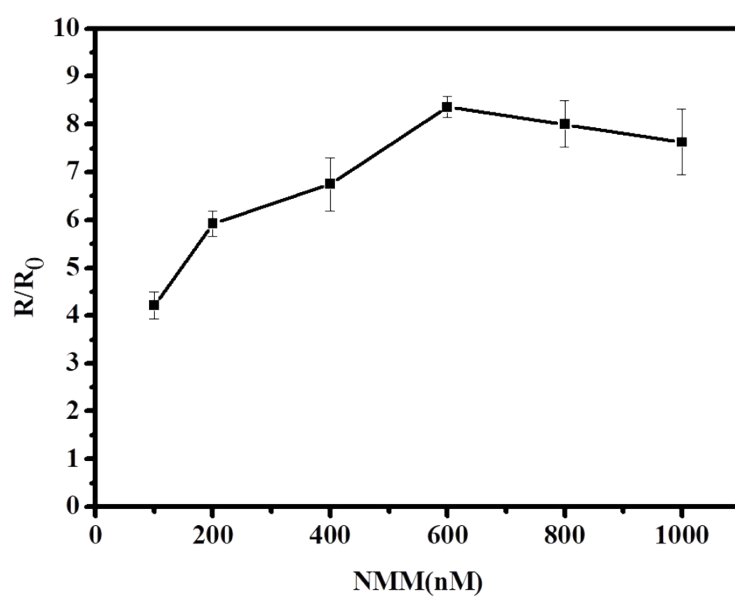

**Fig. S2.** Effect of NMM concentration on the signal-to-background ratio ( $R/R_0$ ). Error bars were estimated from three replicate measurements.

**Table S1.** Figures of recently reported methods for Exo III detection.

| Label or Not | LOD                      | Signal output mode | Ref.         |
|--------------|--------------------------|--------------------|--------------|
| Yes          | 0.04 U/mL                | Single wavelength  | [13]         |
| Yes          | 0.01 U/mL                | Single wavelength  | [14]         |
| Yes          | $3 \times 10^{-4}$ U/mL. | Single wavelength  | [15]         |
| No           | 1 U/ml                   | Single wavelength  | [17]         |
| No           | 0.8 U                    | Single wavelength  | [18]         |
| No           | 0.02 U/mL                | Single wavelength  | [19]         |
| No           | 0.02 U/mL                | Single wavelength  | [20]         |
| No           | 0.7 U/mL                 | Single wavelength  | [21]         |
| No           | 4.42 U/mL                | Ratiometric        | in this work |
